# Supplementary material for: Lack of phylogenetic signals within environmental niches of tropical tree species across life stages
Source: PubMed Central journal article supplement (PMC5299423; doi:10.1038/srep42007), 2017-02-09
Supplement: srep42007-s1.pdf [file srep42007-s1.pdf]

1           **Lack of phylogenetic signals within environmental niches of**  
2                           **tropical tree species across life stages**

3  
4           Caicai Zhang<sup>1,4</sup>, Jie Yang<sup>1</sup>, Liqing Sha<sup>1</sup>, Xiuqin Ci<sup>1,4</sup>, Jie Li<sup>1</sup>, Min Cao<sup>1</sup>, Calum  
5                           Brown<sup>2</sup>, Nathan G. Swenson<sup>1,3</sup>, Luxiang Lin<sup>1,\*</sup>

6  
7           <sup>1</sup>Key Laboratory of Tropical Forest Ecology, Xishuangbanna Tropical Botanical Garden,  
8           Chinese Academy of Science, Menglun, China.

9           <sup>2</sup>School of Geosciences, University of Edinburgh, Edinburgh, UK.

10          <sup>3</sup>Department of Biology, University of Maryland, College Park, USA.

11          <sup>4</sup>University of Chinese Academy of Sciences, Beijing, China.

12  
13          \*Correspondence and requests for materials should to be addressed to L.L. (email:  
14          linluxa@xtbg.ac.cn )

15

16 **Table S1 Criteria of habitat classification for all 20 m × 20 m quadrats in the**  
 17 **20-ha Xishuangbanna forest dynamics plot.**

| Habitats           | Valley  | Slope   | Ridge   |
|--------------------|---------|---------|---------|
| Elevation (m)      | < 779.8 | all     | all     |
| Slope (degree)     | all     | ≥ 27.14 | < 27.14 |
| Convexity (degree) | < 0     | ≥ 0     | all     |

18 27.14 and 779.8 are median elevation and median slope respectively for all 20 m × 20 m  
 19 quadrats within the plot.

20

21 **Table S2 Blomberg's *K* statistic for environmental niches of 64 common species**  
 22 **with both seedlings ≥ 20 individuals and adult trees ≥ 100 individuals.**

| Environmental niches | Seedlings      |                | Large trees    |                |
|----------------------|----------------|----------------|----------------|----------------|
|                      | <i>K</i> value | <i>P</i>       | <i>K</i> value | <i>P</i>       |
| Aspect niches        | 0.50           | 0.548          | 0.54           | 0.328          |
| Convex niches        | 0.51           | 0.497          | 0.55           | 0.258          |
| Elevation niches     | 0.48           | 0.694          | 0.49           | 0.624          |
| Slope niches         | 0.51           | 0.448          | 0.57           | 0.201          |
| PCA axis 1 niches    | 0.42           | 0.973          | 0.51           | 0.462          |
| PCA axis 2 niches    | 0.52           | 0.419          | 0.50           | 0.527          |
| PCA axis 3 niches    | 0.72           | <b>0.009**</b> | 0.81           | <b>0.002**</b> |

23 \*\*  $P < 0.01$

24

25 **Table S3 The phylogenetic dispersion for each of the four species groups with the**  
26 **same habitat preferences. These analyses include only the species with 20 or more**  
27 **seedlings and 100 or more adult trees.**

---

| Habitat                     | Seedlings                  |       |          | Adult trees                |       |          |
|-----------------------------|----------------------------|-------|----------|----------------------------|-------|----------|
| preference of species group | Number of species in group | NRI   | <i>P</i> | Number of species in group | NRI   | <i>P</i> |
| Neutral                     | 39                         | 0.74  | 0.773    | 17                         | -0.31 | 0.350    |
| Valley                      | 11                         | -0.29 | 0.347    | 19                         | -0.18 | 0.385    |
| Slope                       | 7                          | 0.51  | 0.673    | 7                          | -1.49 | 0.087    |
| Ridge                       | 4                          | -1.12 | 0.120    | 9                          | 0.10  | 0.527    |

---

28 **NRI: The Net Relatedness Index; NTI: The Nearest Taxon Index**

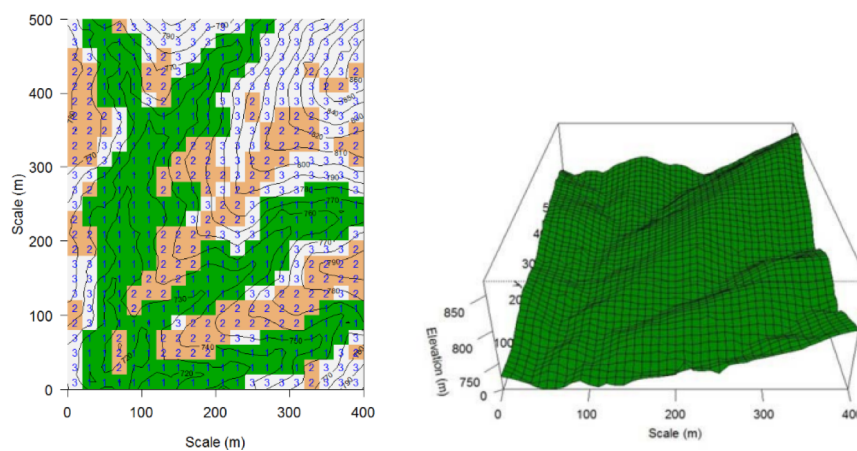

29 **Fig S1 The spatial distribution of the three habitats types in the 20-ha**

30 **Xishuangbanna forest dynamics plot.** “1” represent valley habitat; “2” represent ridge  
 31 habitat; “3” represent slope habitat.  
 32

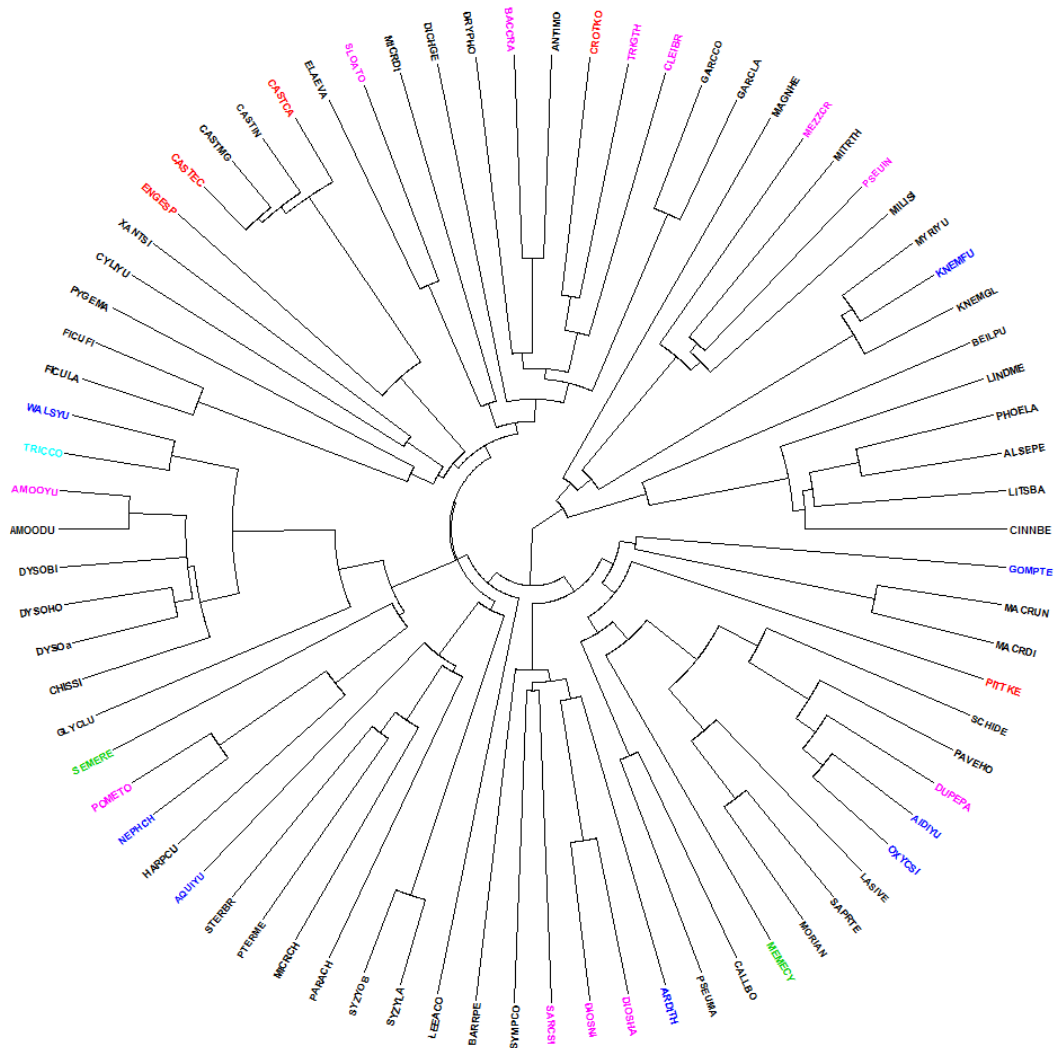

33 **Fig S2 The phylogenetic tree constructed from DNA barcodes of the 78 species of**  
 34 **seedlings that have different associations with three habitats in the 20-ha**  
 35 **Xishuangbanna forest dynamics plot.** “black” represent neutral species, “red” represent  
 36 positive association with ridge, “blue” represent positive association with slope, “pink”  
 37 represent positive association with valley, “green” represent negative with slope and  
 38 “light blue” represent negative with valley.

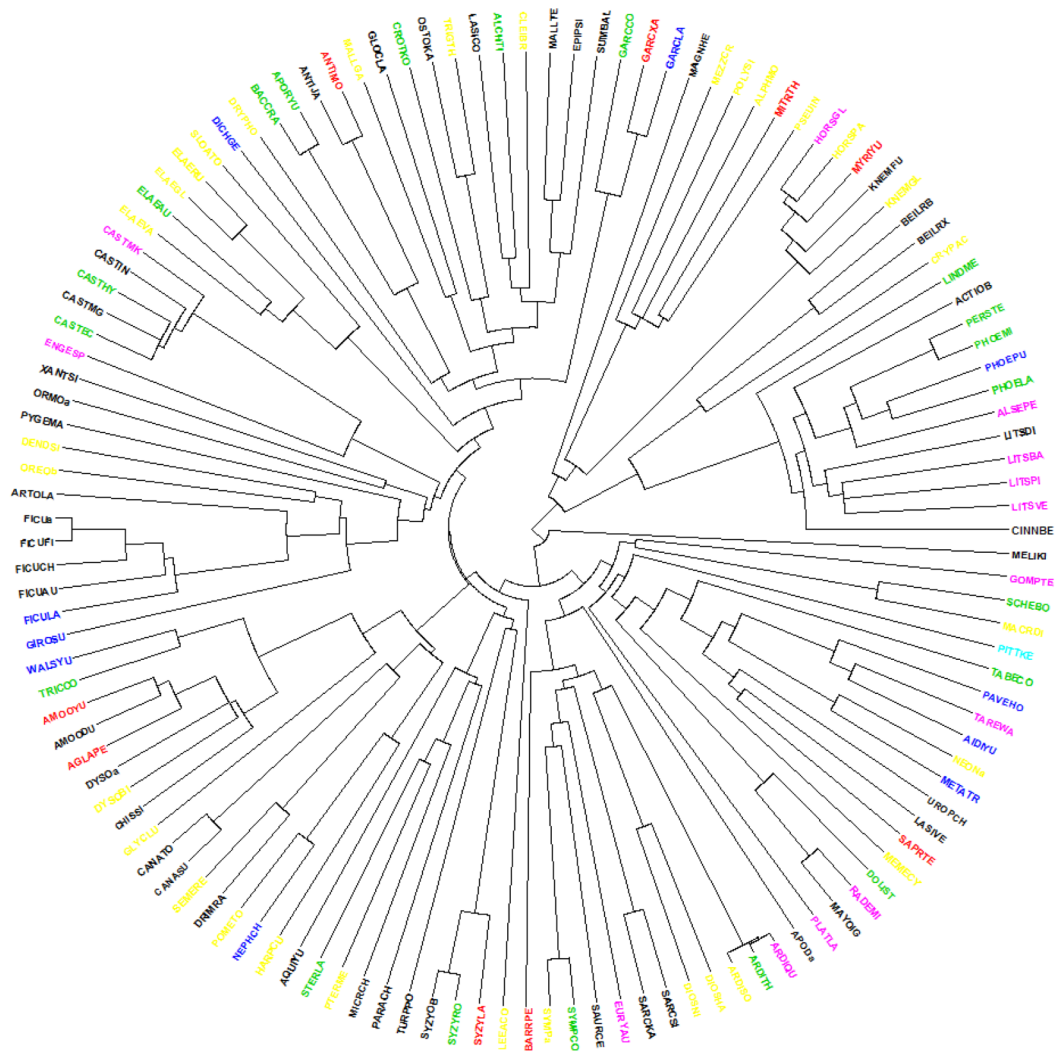

39 **Fig S3 The phylogenetic tree constructed from DNA barcodes of the 127 species of**  
 40 **large trees that have different associations with three habitats in the 20-ha**  
 41 **Xishuangbanna forest dynamics plot. “black” represent neutral species, “green”**  
 42 **represent positive association with ridge, “blue” represent positive association with slope,**  
 43 **“yellow” represent positive association with valley, “light blue” represent positive**  
 44 **association with slope and ridge, “red” represent negative with ridge and “pink” represent**  
 45 **negative with valley.**
